# Supplementary material for: Biomedical applications, perspectives and tag design concepts in the cell – silent Raman window
Source: Royal Society of Chemistry journal article supplement (doi:10.1039/d3cb00217a), 2024-01-01
Supplement: d3cb00217a1.pdf [file d3cb00217a1.pdf]

## SUPPLEMENTARY

**Table SI:** Studies of various Raman modalities recruiting bioorthogonal tags and their respective applications.

| Authors                           | Year of publication | Raman mode                            | Probing                                                   | Type of functional group | Application                                                           |
|-----------------------------------|---------------------|---------------------------------------|-----------------------------------------------------------|--------------------------|-----------------------------------------------------------------------|
| Yamakoshi et al <sup>30</sup>     | 2011                | Spontaneous RS                        | EdU- DNA base                                             | alkyne                   | Imaging of an alkyne-modified molecule (EdU) in living cells.         |
| Yamakoshi et al <sup>31</sup>     | 2012                | Spontaneous RS                        | coenzyme Q (CoQ)                                          | diyne                    | Multicolor imaging of small molecules in living cell                  |
| Yamakoshi et al <sup>32</sup>     | 2015                | Spontaneous RS                        | BADY                                                      | diyne                    | Mitochondria imaging in live cells                                    |
| Matuszyk et al <sup>33</sup>      | 2021                | Spontaneous RS                        | EdU + MitoBADY, falcarinol                                | Alkyne, diyne            | Multiplex Raman imaging of lipid-rich organelles in endothelial cells |
| Cui et al <sup>34</sup>           | 2015                | Spontaneous RS                        | Sphingomyelin                                             | Alkyne, diyne, deuterium | High contrast imaging of lipid rafts                                  |
| Ando et al <sup>35</sup>          | 2015                | Spontaneous RS                        | Sphingomyelin                                             | diyne                    | Imaging of sphingomyelin distribution in lipid monolayer              |
| Jamieson et al <sup>36</sup>      | 2018                | Spontaneous RS                        | Alkyne tagged fatty acids                                 | alkyne                   | Monitoring intracellular uptake and localisation of FAs               |
| Gala de Pablo et al <sup>37</sup> | 2018                | Tandem fluorescence and RS microscopy | DC473 (combining alkyne group and fluorescence)           | alkyne                   | Molecule localization in colorectal cancer cells.                     |
| Meister et al <sup>38</sup>       | 2010                | Spontaneous RS                        | [Mn(tpm)(CO) <sub>3</sub> ]Cl                             | carbonyl                 | Imaging of Metal–Carbonyl Complexes in cells                          |
| Yamakoshi et al <sup>39</sup>     | 2014                | Spontaneous RS                        | carbonylcyanide p-trifluoromethoxy-phenylhydrazone (FCCP) | nitrile                  | Simultaneous imaging of two                                           |

|                                  |      |                |                                                                             |                 |                                                                     |
|----------------------------------|------|----------------|-----------------------------------------------------------------------------|-----------------|---------------------------------------------------------------------|
|                                  |      |                |                                                                             |                 | different molecular structures (protonated and deprotonated FCCP)   |
| Tarrés et al <sup>40</sup>       | 2014 | Spontaneous RS | Cobaltabisdicarbollide (COSAN)                                              | Carborane (B–H) | Detection of boron cluster molecules in living cells                |
| Mochizuki et al <sup>41</sup>    | 2019 | Spontaneous RS | Boron clusters                                                              | Carborane (B–H) | Molecular targeting in the cell                                     |
| Egoshi et al <sup>42</sup>       | 2021 | Spontaneous RS | Deuterated terminal alkynes                                                 | C–D             | Evaluation of H/D exchange of terminal alkynes in living HeLa cells |
| Yamakoshi et al <sup>43</sup>    | 2023 | Spontaneous RS | Thiol adducts and ThioRas                                                   | nitrile         | Monitoring of thia-Michael reaction                                 |
| Tipping et al <sup>44</sup>      | 2020 | Spontaneous RS | 4-((trimethylsilyl)ethynyl)benzotrile                                       | alkyne          | Detection of fluoride anions                                        |
| Takemura et al <sup>45</sup>     | 2020 | Spontaneous RS | dipycolylaminoethyl aniline                                                 | acetylene       | Detection of Zn <sup>2+</sup> in live cells                         |
| Aljakouch et al <sup>46</sup>    | 2018 | Spontaneous RS | Neratinib (TKI inhibitor)                                                   | nitrile         | Monitoring drug metabolism in cancer cells.                         |
| Tang et al <sup>47</sup>         | 2021 | Spontaneous RS | Azo-enhanced RS molecules                                                   | alkyne          | Multicolor spontaneous live cell imaging                            |
| El- Mashtoly et al <sup>73</sup> | 2014 | Spontaneous RS | Erlotinib                                                                   | acetylene       | Drug distribution and metabolism                                    |
| Hong et al <sup>51</sup>         | 2014 | SRS            | Homopropargylglycine, EdU, propargylcholine, Sialylated glycans.            | Alkyne          | Live- cell Imaging of alkyne- tagged biomolecules                   |
| Wei et al <sup>52</sup>          | 2014 | SRS            | EdU, uridine-, methionine-, fatty acid- analogue, terbinafine hydrochloride | alkyne          | Cell division and drug delivery tracking                            |
| Du and Wei <sup>53</sup>         | 2022 | SRS            | Photoactivatable Raman probes                                               | alkyne          | Live-cell multiplexed imaging and tracking                          |
| Ao et al <sup>54</sup>           | 2021 | SRS            | diarylethene                                                                | alkyne          | Photoswitchable SRS imaging                                         |

|                                      |      |          |                                                            |                                          |                                                                                    |
|--------------------------------------|------|----------|------------------------------------------------------------|------------------------------------------|------------------------------------------------------------------------------------|
| Li et al <sup>55</sup>               | 2023 | SRS      | Palmitic acid                                              | Alkyne                                   | Imaging and cellular uptake of the tag                                             |
| Hu et al <sup>56</sup>               | 2015 | SRS      | 3-OPG                                                      | alkyne                                   | Monitoring of glucose uptake activity in live cells and ex vivo mouse brain tissue |
| Long et al <sup>57</sup>             | 2018 | SRS      | D7-glucose, 3-OPG- <sup>13</sup> C <sub>3</sub> probes     | <sup>13</sup> C edited alkyne, deuterium | Glucose metabolism in cell lines and live mouse brain tissues ex vivo              |
| Asai et al <sup>58</sup>             | 2019 | SRS      | Disodium mercaptoundecahydrododecaborate (BSH)-cholesterol | Carborane (B-H)                          | Cellular uptake of boron cluster                                                   |
| Hu et al <sup>59</sup>               | 2018 | SRS      | Carbow                                                     | polyynes                                 | Multiplex imaging of organelles in living cells                                    |
| Wei et al <sup>60</sup>              | 2017 | epr- SRS | MARS palette                                               | Alkynes, nitriles                        | Multiplex optical imaging within live neuronal cells                               |
| Miao et al <sup>61</sup>             | 2021 | epr- SRS | Expanded MARS palette                                      | Alkynes, nitriles                        | Multiplex optical imaging                                                          |
| Chen et al <sup>62</sup>             | 2021 | SRS      | Rdots                                                      | Polyynes                                 | Enhanced multiplex live cell profiling                                             |
| Zhang et al <sup>63</sup>            | 2018 | SRS      | Unnatural amino acid                                       | alkyne                                   | Imaging of genetically targeted proteins in HeLa cells                             |
| Murphy & Tipping et al <sup>64</sup> | 2023 | SRS      | Boron clusters                                             | Carborane (B-H)                          | Multiplex optical imaging in live HeLa cells                                       |
| Fujioka et al <sup>66</sup>          | 2020 | epr- SRS | Enzyme substrates                                          | Isotopically edited nitrile              | Simultaneous enzyme imaging                                                        |
| Wilson et al <sup>67</sup>           | 2021 | SRS      | Mitokyne                                                   | alkyne                                   | Mitochondrial pH monitoring                                                        |
| Braddick et al <sup>68</sup>         | 2023 | SRS      | bisarylbutadiyne                                           | alkyne                                   | Carboxylesterase activity monitoring                                               |
| Zeng et al <sup>69</sup>             | 2018 | SRS      | 2-yne Mito NH2                                             | alkyne                                   | H <sub>2</sub> S imaging in mitochondria                                           |

|                              |      |                        |                                                               |                           |                                                          |
|------------------------------|------|------------------------|---------------------------------------------------------------|---------------------------|----------------------------------------------------------|
| Bi et al <sup>70</sup>       | 2022 | SRS                    | Alkyne- Hydrogen–Deuterium exchange (HDX) of terminal alkynes | alkyne                    | Sensing of DNA structural changes                        |
| Sepp et al <sup>71</sup>     | 2020 | SRS                    | Ponatinib                                                     | alkyne                    | Intracellular distribution of Ponatinib in Live Cells    |
| Crawford et al <sup>72</sup> | 2012 | SRS                    | Rhabduscin                                                    | Isonitrile                | Drug localization at the periphery of bacterial cells    |
| Gaschler et al <sup>74</sup> | 2018 | SRS                    | Ferrostatin analog                                            | diyne                     | Distribution of ferrostatins in living cells             |
| Wilson et al <sup>75</sup>   | 2020 | Spontaneous RS and SRS | Oligoyne compounds                                            | alkyne                    | Intracellular pH sensing.                                |
| Tipping et al <sup>76</sup>  | 2017 | SRS                    | (PhDYANS and BADY-ANS                                         | Diyne                     | Intracellular drug uptake                                |
| Chen et al <sup>79</sup>     | 2016 | SERS                   | alkyne-coded SERS tags with a Au@Ag core                      | Alkyne                    | Multiplex Raman cell imaging                             |
| Kurihara et al <sup>80</sup> | 2016 | SERS                   | hypoxia-detecting probes                                      | acetylene                 | Hypoxia detection                                        |
| Li et al <sup>81</sup>       | 2019 | SERS                   | AuNPs                                                         | alkyne and nitrile groups | Imaging of cancer biomarkers in cells and tissues        |
| Wang et al <sup>82</sup>     | 2020 | SERS                   | aptamer-based Au nanotags                                     | Alkyne                    | MCF-7 targeting for photothermal ablation in living mice |
| Ando et al <sup>83</sup>     | 2016 | SERS                   | Ag NPs nanoparticles                                          | alkyne                    | Cancer drug target identification                        |
| Song et al <sup>84</sup>     | 2014 | SERS                   | AgCu@graphene NPs functionalized with alkyne-PEG              | Alkyne                    | High resolution cell Raman imaging                       |
| Plakas et al <sup>85</sup>   | 2022 | SERS                   | Alkyne- modified pyrylium dyes                                | alkyne                    | Identification of SERS reporters.                        |
| Qin et al <sup>86</sup>      | 2020 | SERS                   | Porous silica- coated AuAg alloy NPs                          | alkyne                    | CO monitoring in cells/ tissues                          |
| Si et al <sup>87</sup>       | 2019 | SERS                   | Porous silica- coated AuAg alloy NPs                          | alkyne                    | H <sub>2</sub> O <sub>2</sub> detection in live cells    |
| Qin et al <sup>88</sup>      | 2018 | SERS                   | Au nanorod- based nanoprobe                                   | alkyne                    | Caspase 3 detection in live cells/ tissues               |
| Si et al <sup>89</sup>       | 2018 | SERS                   | Alloyed Au/Ag Nanospheres                                     | alkyne                    | Detection of intracellular                               |

|                                      |      |                                                                |                                                                         |                 |                                                                     |
|--------------------------------------|------|----------------------------------------------------------------|-------------------------------------------------------------------------|-----------------|---------------------------------------------------------------------|
|                                      |      |                                                                |                                                                         |                 | endonuclease levels in living cells                                 |
| Qin et al <sup>90</sup>              | 2019 | SERS                                                           | Ag/Au alloy NPs                                                         | azoalkyne       | Hypoxia detection in cells/ animal tissues                          |
| Kong et al <sup>92</sup>             | 2012 | SERS                                                           | Au NPs                                                                  | carbonyl        | High-contrast live-cell imaging                                     |
| Kong et al <sup>93</sup>             | 2013 | SERS                                                           | Au NPs                                                                  | carbonyl        | Glucose monitoring in urine                                         |
| Kong et al <sup>94</sup>             | 2014 | SERS                                                           | Gold coated planar substrate                                            | carbonyl        | pH monitoring                                                       |
| Lin et al <sup>95</sup>              | 2018 | SERS                                                           | SERS- active substrate                                                  | carbonyl        | Epstein-Barr virus cfDNA detection in blood                         |
| Panikkanvalappil et al <sup>96</sup> | 2019 | Plasmonically Enhanced Raman Spectroscopy (PERS)               | Gold nanocubes (PEG/RGD/NLS-functionalized NPs)                         | carbonyl        | Monitoring HO-1 activation in live cells during cisplatin treatment |
| Ma et al <sup>97</sup>               | 2017 | Interference-Free SERS (IF-SERS)                               | Au@4-MB NPs                                                             | nitrile         | Cancer biomarkers profiling at single-cell level                    |
| Yin et al <sup>98</sup>              | 2017 | SERRS                                                          | Au@PB NPs                                                               | nitrile         | High-sensitivity immunoassay and cancer cell imaging                |
| Kennedy et al <sup>99</sup>          | 2009 | SERS                                                           | Carborane-coated silver NPs co-functionalized with anti-EGFR antibodies | Carborane (B-H) | Tumour cell targetting and boron delivery to cancer cells           |
| Lin et al <sup>101</sup>             | 2013 | SERS                                                           | MPBA-Au NPs                                                             | alkyne          | Detection of cell surface glycans                                   |
| Liang et al <sup>102</sup>           | 2018 | SERS                                                           | Gold nanoprobos                                                         | alkyne          | Tumor Cell targeting in living mice                                 |
| Lin et al <sup>103</sup>             | 2019 | SERS + SMIP (Surface Molecularly Imprinted Polymer) technology | Gold NPs                                                                | acetylene       | Detection of cancer biomarker (CEA) in human blood                  |

|                                   |      |                                |                                                |                              |                                                                         |
|-----------------------------------|------|--------------------------------|------------------------------------------------|------------------------------|-------------------------------------------------------------------------|
| Koike et al <sup>104</sup>        | 2020 | 3D SERS                        | Gold NPs                                       | alkyne                       | Real-time monitoring of small- molecule drug uptake in live macrophages |
| Tanuma et al <sup>105</sup>       | 2020 | Fluorescence microscopy + SERS | Silver NPs                                     | alkyne                       | Imaging of antidepressant drug analogue in mouse brain                  |
| Wu et al <sup>106</sup>           | 2021 | SERS                           | Au NPs                                         | nitrile                      | Monitoring of pesticide residues in soybean plants                      |
| Mi et al <sup>107</sup>           | 2021 | SERS                           | Au NPs                                         | Nitrile after UV irradiation | Determination of cymoxanil residue in food                              |
| Hu et al <sup>110</sup>           | 2017 | SRS                            | Polymer dots                                   | Alkyne, nitrile, C–D         | Multiplexed live cell imaging                                           |
| Vanden-Hehir et al <sup>111</sup> | 2019 | SRS                            | PLGA NPs                                       | Deuterium and alkyne         | Mouse brain tissue imaging                                              |
| Jin et al <sup>112</sup>          | 2019 | SRS                            | Raman beads                                    | Alkyne, nitrile, azide, C–D  | Supermultiplex barcoding                                                |
| Li et al <sup>116</sup>           | 2017 | Spontaneous RS                 | PPE- based CPNs                                | Alkyne                       | Enhanced live cell imaging                                              |
| Zhu et al <sup>117</sup>          | 2021 | SRS                            | Polymer NPs                                    | Alkyne                       | Highly sensitive multi-color biomedical imaging                         |
| Tian et al <sup>118</sup>         | 2020 | SRS                            | PDDA NPs                                       | Alkyne                       | Organelle-targeting live-cell imaging                                   |
| Matthaus et al <sup>122</sup>     | 2012 | Spontaneous RS                 | Deuterated fatty acids, deuterated cholesterol | C–D                          | Imaging of Intracellular Lipid Metabolism in Macrophages                |
| van Manen et al <sup>123</sup>    | 2005 | Raman microscopy               | Deuterated arachidonic acid                    | C–D                          | Imaging of lipid bodies in leukocytes                                   |
| van Manen et al <sup>124</sup>    | 2008 | Spontaneous RS                 | Deuterated tyrosine and methionine             | C–D                          | Imaging of Protein Metabolic Labeling in Single Human Cells             |

|                                     |      |                        |                        |     |                                                                                              |
|-------------------------------------|------|------------------------|------------------------|-----|----------------------------------------------------------------------------------------------|
| Wei et al <sup>125</sup>            | 2013 | Spontaneous RS         | Deuterated amino-acids | C–D | Imaging of newly synthesized proteins in live mammalian cells                                |
| Wei et al <sup>126</sup>            | 2015 | Spontaneous RS         | Deuterated amino-acids | C–D | Imaging of protein metabolism in live cancer cells, neurons and mouse brain.                 |
| Shi et al <sup>127</sup>            | 2018 | Spontaneous RS         | Deuterated amino-acids | C–D | In vivo imaging of protein metabolism in mice                                                |
| Spratt et al <sup>128</sup>         | 2022 | Spontaneous RS         | d <sub>8</sub> -Met    | C–D | Imaging of cellular uptake of deuterated methionine (d <sub>8</sub> -Met) in live HeLa cells |
| Spratt et al <sup>129</sup>         | 2023 | Spontaneous RS         | d <sub>8</sub> -Met    | C–D | Imaging the uptake of deuterated methionine in Drosophila                                    |
| Stiebing et al <sup>130</sup>       | 2017 | Spontaneous RS and SRS | d31-palmitic acid      | C–D | Uptake and metabolic dynamics of d31-palmitic acid storage in human macrophages              |
| Alfonso-García et al <sup>131</sup> | 2016 | SRS                    | D38-cholesterol        | C–D | Imaging of intracellular cholesterol storage in mammalian cells                              |
| Villareal et al <sup>132</sup>      | 2016 | SRS                    | Deuterated sterols     | C–D | Imaging of intracellular localization of desmosterol                                         |
| Li et al <sup>133</sup>             | 2014 | SRS and Spontaneous RS | d7- glucose            | C–D | Study of dynamic metabolism of glucose in single living cancer cells, visualizing            |

|                            |      |                                                |                                                                                     |             |                                                                                                         |
|----------------------------|------|------------------------------------------------|-------------------------------------------------------------------------------------|-------------|---------------------------------------------------------------------------------------------------------|
|                            |      |                                                |                                                                                     |             | de novo lipogenesis                                                                                     |
| Hu et al <sup>134</sup>    | 2014 | SRS                                            | d9- choline                                                                         | C–D         | Distribution of choline metabolites in cancer and non-cancer cells                                      |
| Fu et al <sup>135</sup>    | 2014 | Hypespectral SRS imaging                       | deuterated saturated and unsaturated fatty acid                                     | C–D         | Metabolic imaging of fatty acids in living <i>C. elegans</i> .                                          |
| Yu et al <sup>136</sup>    | 2017 | SRS with high throughput screening (HTS)       | d34- oleic acid                                                                     | C–D         | Imaging of lipid synthesis in live <i>C. elegans</i> .                                                  |
| Zhang et al <sup>137</sup> | 2011 | Femtosecond excitation source with SRS imaging | d31- palmitic acid                                                                  | C–D         | 3D sectioning of fat storage in live <i>C. elegans</i>                                                  |
| Wei et al <sup>138</sup>   | 2019 | Clearing-enhanced DO-SRS microscopy            | deuterium oxide                                                                     | C–D         | Volumetric (3D) chemical imaging of macromolecules in mouse tumors.                                     |
| Chen et al <sup>139</sup>  | 2014 | SRS and Spontaneous RS                         | <sup>12</sup> C and <sup>13</sup> C isotopically edited alkynyl metabolic reporters | Alkyne      | Multiplex chemical imaging of RNA, newly uptaken fatty-acids and DNA synthesis in live mammalian cells. |
| Hu et al <sup>140</sup>    | 2016 | SRS                                            | <sup>12</sup> C and <sup>13</sup> C labeled EdU isotopologues                       | C–D, alkyne | Monitoring of DNA synthesis dynamics in mammalian hippocampal slice culture.                            |
| Shi et al <sup>141</sup>   | 2018 | Spontaneous RS and SRS                         | deuterium oxide                                                                     | C–D         | In situ metabolic activities in animal tissue.                                                          |
| Zhang et al <sup>142</sup> | 2019 | Spontaneous RS and SRS                         | deuterated glucose                                                                  | C–D         | Imaging of glucose metabolism                                                                           |
| Hong et al <sup>143</sup>  | 2018 | SRS                                            | deuterated glucose                                                                  | C–D         | Monitoring of glucose metabolism in a                                                                   |



|                                |      |                                              |                                                                     |             |                                                                                |
|--------------------------------|------|----------------------------------------------|---------------------------------------------------------------------|-------------|--------------------------------------------------------------------------------|
|                                |      |                                              |                                                                     |             | single living bacterium.                                                       |
| Yang et al <sup>144</sup>      | 2019 | Spontaneous RS                               | Heavy water (D2O)                                                   | C–D         | Antibiotic Susceptibility Testing of Pathogenic Bacteria                       |
| Zhang et al <sup>145</sup>     | 2017 | SRS                                          | d7- glucose, CD- amino acids, d31- palmitate acid, propargylcholine | C–D, alkyne | Cancer metabolism during the epithelial–mesenchymal transition of cancer cells |
| Shen et al <sup>146</sup>      | 2017 | SRS                                          | d-palmitate                                                         | C–D         | Study of lipid metabolism in endoplasmic reticulum cell membrane.              |
| Matthaeus et al <sup>147</sup> | 2008 | Spontaneous RS                               | deuterium-labelled liposomal drug carriers                          | C–D         | Imaging of liposomal drug carrier systems inside cells.                        |
| Saar et al <sup>148</sup>      | 2010 | SRS                                          | deuterated ibuprofen                                                | C–D         | Ex vivo monitoring of drug delivery to mice ears.                              |
| Chen et al <sup>149</sup>      | 2015 | Coherent Anti-Stokes Raman Scattering (CARS) | deuterated active molecules (glycerol, jasmonic acid and water)     | C–D         | Active molecule mapping inside artificial and human skin.                      |
| Saar et al <sup>150</sup>      | 2010 | SRS                                          | deuterated dimethyl sulfoxide (DMSO)                                | C–D         | In vivo imaging of DMSO on a human forearm.                                    |

**Table SII:** Raman intensity versus EdU (RIE) and Raman shift of various moieties exhibiting a Raman signal in the cell- silent Raman region, as mentioned in studies of various Raman modalities.

| Compound | Molecular structure | Modality | Strength vs EdU | Raman Shift (cm <sup>-1</sup> ) | Mean Raman shift (cm <sup>-1</sup> ) | Ref |
|----------|---------------------|----------|-----------------|---------------------------------|--------------------------------------|-----|
|----------|---------------------|----------|-----------------|---------------------------------|--------------------------------------|-----|

|                                   |                                                                                                                              |    |       |           |      |    |
|-----------------------------------|------------------------------------------------------------------------------------------------------------------------------|----|-------|-----------|------|----|
| Phenylalanine (Phe)               | 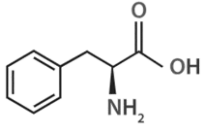                                            | RS | 0.2   | 1003      | 1003 | 30 |
| Edu (Ethynyl-2'-deoxyuridine)     |                                             | RS | 1     | 2110      | 2110 | 30 |
| Terminal Alkynes                  |                                             | RS | 0.485 | 2084-2113 | 2099 | 31 |
| Silyl and Haloalkynes             | $\begin{array}{l} \text{Ar} \text{---} \text{C} \equiv \text{X} \\ \text{R} \text{---} \text{C} \equiv \text{X} \end{array}$ | RS | 1.25  | 2157-2195 | 2176 | 31 |
| Internal alkynes                  |                                            | RS | 3.17  | 2198-2248 | 2223 | 31 |
| Diyne                             |                                           | RS | 3.4   | 2207-2249 | 2228 | 31 |
| Bisaryl-substituted diynes (BADY) |                                           | RS | 25    | 2217-2221 | 2219 | 31 |
| Nitrile                           | $\text{R}-\text{C} \equiv \text{N}$                                                                                          | RS | 0.062 | 2242      | 2242 | 31 |
| Azide                             | $\text{N}^- = \text{N}^+ = \text{N}^-$                                                                                       | RS | 0.022 | 2096      | 2096 | 31 |
| MitoBADY                          |                                           | RS | 27    | 2218      | 2218 | 32 |

|                                                                     |                                                                                     |                |       |           |      |     |
|---------------------------------------------------------------------|-------------------------------------------------------------------------------------|----------------|-------|-----------|------|-----|
| Deuterated hexanoic acid with $^{11}\text{C}$ D                     |    | RS             | 0.062 | 2124      | 2124 | 31  |
| Azobenzene (AERS)                                                   |    | RS             | 104   | 2114-2222 | 2168 | 47  |
| C-D                                                                 | C-D                                                                                 | SRS            | 0.025 | 2100      | 2100 | 125 |
| N-(3-azidopropyl)-4-(phenylbuta-1,3-dien-1-yl)benzamide-phenyl ring |    | SRS            | 29    | 2225      | 2225 | 63  |
| 9CN-JCP                                                             |   | EPR - SRS      | 87    | 2220      | 2220 | 66  |
| Poly(phenylene ethynylene)-PPE derivatives                          |  | RS             | 1.8   | 2200      | 2220 | 116 |
| PDPA                                                                |  | RS             | 200   | 2120      | 2120 | 118 |
| Triple-bond-encoded polymer NPs                                     |  | SRS microscopy | 140   | 2223-2241 | 2232 | 117 |

|  |  |  |  |  |  |  |
|--|--|--|--|--|--|--|
|  |  |  |  |  |  |  |
|--|--|--|--|--|--|--|
